# Supplementary material for: A simple detection method for the serum sFLT1 protein in preeclampsia
Source: PubMed Central journal article supplement (PMC8523687; doi:10.1038/s41598-021-00152-6), 2021-10-18
Supplement: 41598_2021_152_MOESM1_ESM.pdf [file 41598_2021_152_MOESM1_ESM.pdf]

## A simple detection method for the serum sFLT1 protein in preeclampsia.

Masabumi Shibuya<sup>1,\*</sup>, Haruka Matsui<sup>2</sup>, Tadashi Sasagawa<sup>1</sup> & Takeshi Nagamatsu<sup>2</sup>

<sup>1</sup>Institute of Physiology and Medicine, Jobu University, Gunma, Japan.

<sup>2</sup>Department of Obstetrics and Gynecology, Faculty of Medicine, The University of Tokyo, Tokyo, Japan.

\*Correspondence

Tel: +81 274-20-2115

Fax: +81 274-42-5204

E-mail: shibuya@ims.u-tokyo.ac.jp

Keywords: sFLT1, preeclampsia, simple detection.

Running title: A simple detection method for serum sFLT1

Supplementary Figure 1. (Shibuya)

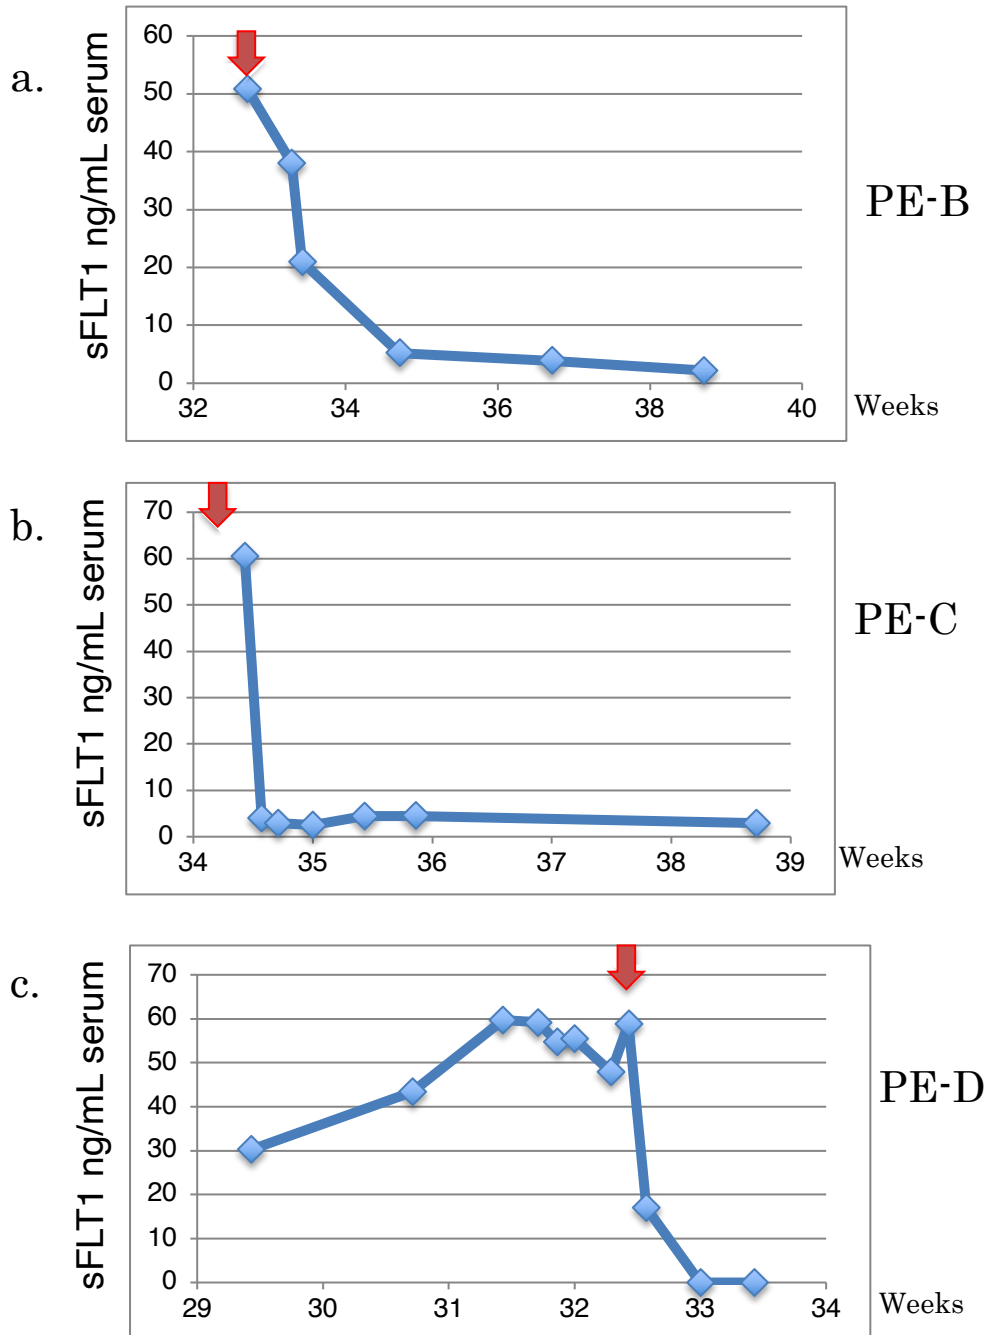

Supplementary Figure 1: The sFLT1 levels in the serum obtained from 3 severe PE cases (PE-B, C and D) at the stage of pre- and post-delivery. The values were detected with the HB-ELISA assay.
